# Supplementary material
Source: Royal Society of Chemistry journal article supplement (doi:10.1039/d6nr00269b)
Supplement: d6nr00269b1.pdf [file d6nr00269b1.pdf]

## High Throughput Generation of High- $zT$ Thermoelectrics with Precise Stoichiometric Controls

Yuelin Wang<sup>a#</sup>, Chengquan Zhong<sup>a,b#</sup>, Jingzi Zhang<sup>a,d</sup>, Kailong Hu<sup>a,c</sup> Junjie Chen<sup>d\*</sup>, and Xi Lin<sup>a,b,c,e\*</sup>

<sup>a</sup>School of Materials Science and Engineering, Harbin Institute of Technology, Shenzhen 518055, Guangdong, China

<sup>b</sup> College of Marine Equipment and Mechanical Engineering, Jimei University, Xiamen 361021, Fujian, China

<sup>c</sup>State Key Laboratory of Advanced Welding and Joining, Harbin Institute of Technology, Harbin 150001, Heilongjiang, China

<sup>d</sup>Department of Computer Science and Technology, Harbin Institute of Technology, Shenzhen 518055, Guangdong, China

<sup>e</sup> Sunrise (Xiamen) Photovoltaic Industry Co. Ltd. 44 Huli Avenue, Huli District, Xiamen, Fujian 361000, China

### Corresponding authors

\*E-mail: [linxi@hit.edu.cn](mailto:linxi@hit.edu.cn)

\*E-mail: [junjiechen@hit.edu.cn](mailto:junjiechen@hit.edu.cn)

\*E-mail: [zjzhang@hit.edu.cn](mailto:zjzhang@hit.edu.cn)

\*E-mail: [zhongchengquan@gmail.com](mailto:zhongchengquan@gmail.com)

#These authors contributed equally to this work.

Keywords: Thermoelectric materials, Inverse design, Diffusion model

| Formula                        | zT   |
|--------------------------------|------|
| Pb0.933Cu0.067Te               | 1.55 |
| Ge0.965Zn0.035Te               | 2.11 |
| Bi1.942Te0.058Te3              | 1.96 |
| Ge0.943Cu0.057Te               | 1.2  |
| Sn0.931K0.069Se                | 1.72 |
| Bi1.973Br0.027Te3              | 1.31 |
| Mg2.978Cl0.022Sb2              | 1.92 |
| Bi1.958Ba0.042Te3              | 1.93 |
| Ge0.99Cu0.01Te                 | 1.79 |
| Bi1.948Br0.052Te3              | 1.32 |
| Pb0.92Mg0.06Na0.02Te0.85Se0.15 | 1.89 |
| Te0.041Co4Sb1                  | 1.28 |
| Ge0.986Zn0.014Te               | 1.27 |
| Bi1.975La0.025Te3              | 1.59 |
| Ge0.981Li0.019Te               | 1.29 |
| Pb0.979K0.021Te                | 1.21 |
| Br0.081Co4Sb1                  | 1.25 |
| Bi1.976Te0.024Te3              | 1.83 |
| Bi1.982Ba0.018Te3              | 1.58 |
| Mg2.98Ba0.02Sb2                | 1.38 |
| Ge0.93Li0.07Te                 | 1.48 |
| Bi1.98La0.02Te3                | 1.99 |
| Pb0.953Li0.047Te               | 1.45 |
| Bi1.931Cl0.069Te3              | 1.45 |
| Ge0.948K0.052Te                | 1.32 |
| Bi1.965Cl0.035Te3              | 1.02 |
| Mg2.917Ba0.083Sb2              | 1.97 |
| Ge0.966Li0.034Te               | 1.27 |
| Br0.079Co4Sb1                  | 1.02 |
| Pb0.953K0.047Te                | 1.85 |
| Mg2.921I0.079Sb2               | 1.75 |
| Pb0.984Ag0.016Te               | 1.39 |
| Pb0.971Zn0.029Te               | 1.84 |
| Pb0.916Li0.084Te               | 1.91 |
| Mg2.986La0.014Sb2              | 1.29 |
| Bi1.955Cl0.045Te3              | 1.4  |
| Br0.037Co4Sb1                  | 1.97 |
| Ge0.943Ag0.057Te               | 1.43 |
| Mg2.926Cl0.074Sb2              | 1.01 |
| Ge0.916Zn0.084Te               | 1.04 |
| Pb0.965Li0.035Te               | 1.74 |

|                          |      |
|--------------------------|------|
| Pb0.914Cu0.086Te         | 1.52 |
| Ge0.975Ag0.025Te         | 1.54 |
| Pb0.955Li0.045Te         | 1.01 |
| Mg2.928La0.072Sb2        | 1.01 |
| Ge0.969Zn0.031Te         | 1.5  |
| Bi1.995I0.005Te3         | 1.72 |
| Sn0.916Zn0.084Se         | 1.73 |
| Bi1.994Yb0.006Te3        | 1.96 |
| Ge0.941Zn0.059Te         | 1.83 |
| Ba0.013Co4Sb1            | 1.06 |
| Ge0.937Cu0.063Te         | 1.96 |
| Sn0.989Li0.011Se         | 2.21 |
| Pb0.924Ag0.076Te         | 1.3  |
| Bi1.927Yb0.073Te3        | 1.28 |
| Ge0.966K0.034Te          | 1.75 |
| Pb0.958Ag0.042Te         | 1.15 |
| Yb0.078Co4Sb1            | 1.28 |
| Ge0.977Cu0.023Te         | 1.59 |
| La0.021Co4Sb1            | 1.56 |
| Bi1.943Ba0.057Te3        | 1.18 |
| Mg3.05Zn0.15Sb1.48Bi0.52 | 1.62 |
| Mg2.964Ba0.036Sb2        | 1.73 |
| Pb0.914Ag0.086Te         | 1.51 |
| Mg2.983I0.017Sb2         | 1.15 |
| Ge0.957Ag0.043Te         | 1.36 |
| Bi1.936Ba0.064Te3        | 1.78 |
| Ba0.069Co4Sb             | 1.18 |
| Pb0.934Na0.066Te         | 1.25 |
| Bi1.977Cl0.023Te3        | 1.4  |
| Pb0.962Na0.038Te         | 1.22 |
| Pb0.983Zn0.017Te         | 1.05 |
| Mg2.989Yb0.011Sb2        | 2.15 |
| Bi1.917Br0.083Te3        | 1.98 |
| Br0.029Co4Sb1            | 1.51 |
| Mg2.941Yb0.059Sb2        | 1.35 |
| Te0.052Co4Sb1            | 2.3  |
| La0.076Co4Sb1            | 1.61 |
| Bi1.955La0.045Te3        | 2.1  |
| Mg2.986Cl0.014Sb2        | 2.2  |
| Bi1.965Ba0.035Te3        | 1.46 |
| Sn0.978Ag0.022Se         | 1.3  |
| Ge0.921Cu0.079Te         | 1.71 |
| Ge0.971Cu0.029Te         | 1.23 |

|                     |      |
|---------------------|------|
| Sn0.954Li0.046Se    | 1.69 |
| Pb0.943Na0.057Te    | 2.17 |
| Bi1.928Yb0.072Te3   | 1.44 |
| Ge0.92Ag0.08Te      | 1.07 |
| Pb0.945K0.055Te     | 1.99 |
| Pb0.937K0.063Te     | 1.16 |
| Ge0.928Na0.072Te    | 1.24 |
| Sn0.979Na0.021Se    | 1.15 |
| Bi1.945I0.055Te3    | 1.29 |
| Mg2.932I0.068Sb2    | 2.17 |
| Mg2.96Br0.04Sb2     | 1.17 |
| Te0.01Co4Sb1        | 1.98 |
| Li0.03K0.26Cu1.71Se | 2.21 |
| Ge0.963K0.037Te     | 2.1  |
| Pb0.975Cu0.025Te    | 1.6  |
| Pb0.933Cu0.067Te    | 1.55 |
| Ge0.965Zn0.035Te    | 2.11 |
| Bi1.942Te0.058Te3   | 1.96 |
| Ge0.943Cu0.057Te    | 1.2  |

Table S1. The other 99 generated potential high-performance thermoelectric materials

| Stoichiometric Formula                                                             | Calculation Settings                                                              | DFT-calculated Formation Energy (eV/atom) | Roost-predicted Formation Energy (eV/atom) | Maximum Predicted zT (Temperature) |
|------------------------------------------------------------------------------------|-----------------------------------------------------------------------------------|-------------------------------------------|--------------------------------------------|------------------------------------|
| $\text{Pb}_{0.92}\text{Mg}_{0.06}\text{Na}_{0.02}\text{Te}_{0.85}\text{Se}_{0.15}$ | VASP, PAW pseudopotential, HSE06 functional, 500 eV cutoff, 12×12×12 k-point mesh | -0.39                                     | -0.35                                      | 1.89(700K)                         |
| $\text{Mg}_{3.05}\text{Zn}_{0.15}\text{Sb}_{1.48}\text{Bi}_{0.52}$                 | VASP, PAW pseudopotential, HSE06 functional, 500 eV cutoff, 12×12×12 k-point mesh | -0.47                                     | -0.40                                      | 1.62(600K)                         |
| $\text{Li}_{0.03}\text{K}_{0.26}\text{Cu}_{1.71}\text{Se}$                         | VASP, PAW pseudopotential, HSE06 functional, 500 eV cutoff, 12×12×12 k-point mesh | -0.33                                     | -0.42                                      | 2.21(1000K)                        |

Table S2. DFT validation results of additional thermoelectric candidates
